# Supplementary material
Source: PubMed Central journal article supplement (PMC3119120)
Supplement: supp_00427.2010_video_caption.pdf [file supp_00427.2010_video_caption.pdf]

1 **DATA SUPPLEMENTS**

2 Video 1- EGC-CM-mediated increase in epithelial restitution in mechanical-injured Caco-  
3 2 cell monolayers

4 Video 1 shows wound healing of Caco-2 monolayers following mechanical-induced injury  
5 in absence (*left video*) or in presence (*right video*) of EGC-conditioned medium. The IEC  
6 monolayers were cultured onto transwell filters. The video was recorded for the first 24 hours  
7 following injury. Images were acquired every 20 minutes and are displayed at a rate of 3  
8 frames/s. The lower panel illustrates the evolution over time of the wounded surface area in  
9 absence (blue) or presence (red) of EGC-conditioned medium.

10 Video 2- EGC-CM-mediated increase in IEC spreading

11 Video 2 shows cell spreading of proliferative Caco-2 cells in absence (*left video*) or in  
12 presence (*right video*) of EGC-conditioned medium. Caco-2 cells were cultured onto  
13 transwell filters. The video was recorded for 24 hours. Images were acquired every 10  
14 minutes and are displayed at a rate of 7 frames/s.
